# Supplementary material for: A highly accurate metadynamics-based Dissociation Free Energy method to calculate protein–protein and protein–ligand binding potencies
Source: PubMed Central journal article supplement (PMC8821539; doi:10.1038/s41598-022-05875-8), 2022-02-07
Supplement: 41598_2022_5875_MOESM1_ESM.pdf [file 41598_2022_5875_MOESM1_ESM.pdf]

## Supplementary Information

A highly accurate metadynamics-based Dissociation Free Energy method to calculate protein-protein and protein-ligand binding potencies

Jing Wang<sup>1,\*</sup>, Alexey Ishchenko<sup>1</sup>, Wei Zhang<sup>1</sup>, Asghar Razavi<sup>1</sup> and David Langley<sup>1</sup>

**Supplementary Table S1. Comparison of DFE method and FEP+ method in terms of R<sup>2</sup> and SE (standard error) in Least-Square-Fitting of calculated free energies into experimental binding free energies.**

| Target                | DFE- $\Delta G_e$ R <sup>2</sup> <sup>a</sup> | DFE- $\Delta G_e$ SE (kcal/mol) <sup>a</sup> | $\Delta G_{FEP+}$ - $\Delta G_e$ R <sup>2</sup> <sup>b</sup> | $\Delta G_{FEP+}$ - $\Delta G_e$ SE (kcal/mol) <sup>b</sup> |
|-----------------------|-----------------------------------------------|----------------------------------------------|--------------------------------------------------------------|-------------------------------------------------------------|
| CDK2                  | 0.67                                          | 0.72                                         | 0.23                                                         | 1.11                                                        |
| TYK2                  | 0.66                                          | 0.79                                         | 0.79                                                         | 0.61                                                        |
| P38 $\alpha$          | 0.6                                           | 0.65                                         | 0.43                                                         | 0.78                                                        |
| JNK1                  | 0.51                                          | 0.62                                         | 0.72                                                         | 0.47                                                        |
| MCL1                  | 0.48                                          | 0.78                                         | 0.6                                                          | 0.69                                                        |
| PTP1B                 | 0.35                                          | 1.09                                         | 0.64                                                         | 0.8                                                         |
| BACE                  | 0.32                                          | 0.65                                         | 0.61                                                         | 0.49                                                        |
| Thrombin <sup>c</sup> | 0.01 (0.62)                                   | 0.57 (0.36)                                  | 0.5                                                          | 0.41                                                        |
| Average <sup>c</sup>  | 0.45 (0.53)                                   | 0.73 (0.71)                                  | 0.56                                                         | 0.67                                                        |

<sup>a</sup>Derived by Least-Square-Fitting of calculated DFE to experimental  $\Delta G_e$ . Same numbers have been reported in Table 3.

<sup>b</sup>Derived by Least-Square-Fitting of  $\Delta G_{FEP+}$  to  $\Delta G_e$ , both taken from Wang, L. et al. *J. Am. Chem. Soc.* **137**, 2695–2703 (2015).

<sup>c</sup>The numbers in the parentheses correspond to the results after exclusion of two outlier points in the Thrombin data set.

**Supplementary Table S2. Calculated DFE of PPC 3A4S for different definitions of CV before and after the correction process.**

| CV <sup>a</sup>                      | DFE without correction (kcal/mol) | DFE with correction (kcal/mol) |
|--------------------------------------|-----------------------------------|--------------------------------|
| I45 <sup>B</sup> -V345 <sup>C</sup>  | -13.8                             | -13.04                         |
| I45 <sup>B</sup> -I408 <sup>C</sup>  | -14.42                            | -13.61                         |
| I112 <sup>B</sup> -V345 <sup>C</sup> | -14.46                            | -14.63                         |
| L113 <sup>B</sup> -V345 <sup>C</sup> | -14.72                            | -14.16                         |
| L113 <sup>B</sup> -I408 <sup>C</sup> | -16.14                            | -15.16                         |
| W16 <sup>B</sup> -V345 <sup>C</sup>  | -16.17                            | -15.28                         |
| W16 <sup>B</sup> -L407 <sup>C</sup>  | -16.53                            | -16                            |
| Standard Deviation <sup>b</sup>      | 1.08                              | 1.03                           |
| SEM <sup>c</sup>                     | 0.41                              | 0.39                           |

<sup>a</sup>A CV is defined as the distance between the centroid of the backbone heavy atoms of a residue from protein B and the centroid of the backbone heavy atoms of a residue from protein C.

<sup>b</sup>Standard deviation among the set of DFE values in the rows above.

<sup>c</sup>Standard error of the mean among the set of DFE values in the rows above.

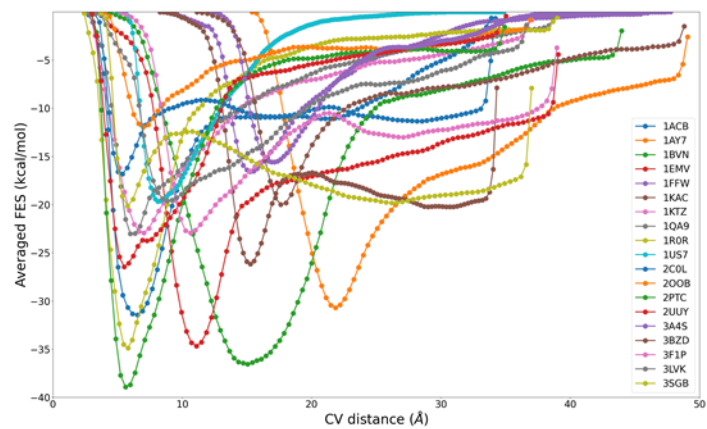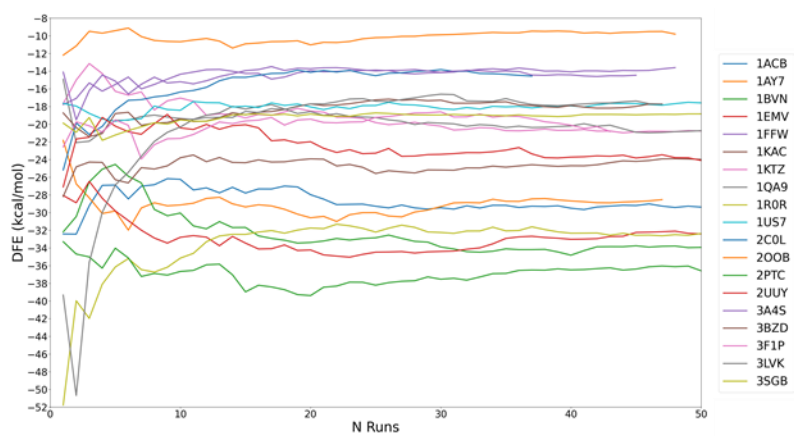

**Supplementary Figure S1. Averaged FES (upper panel) and convergence plots (lower panel) for the 19 PPCs calculated using the DFE procedure.**

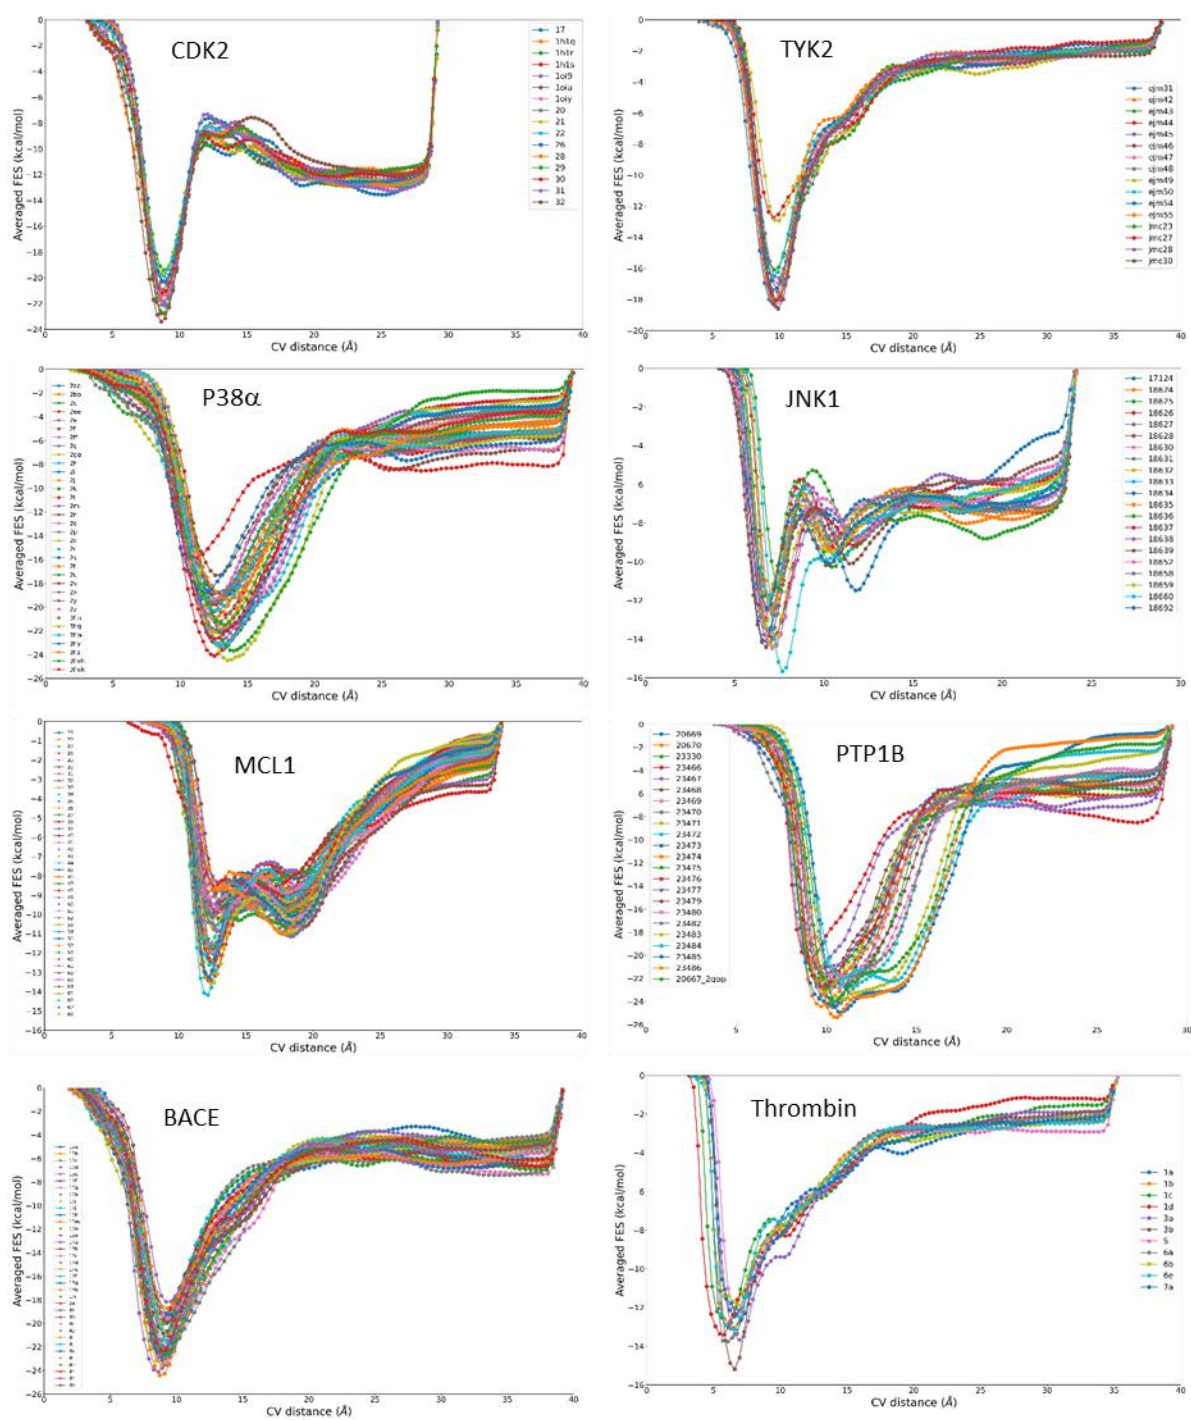

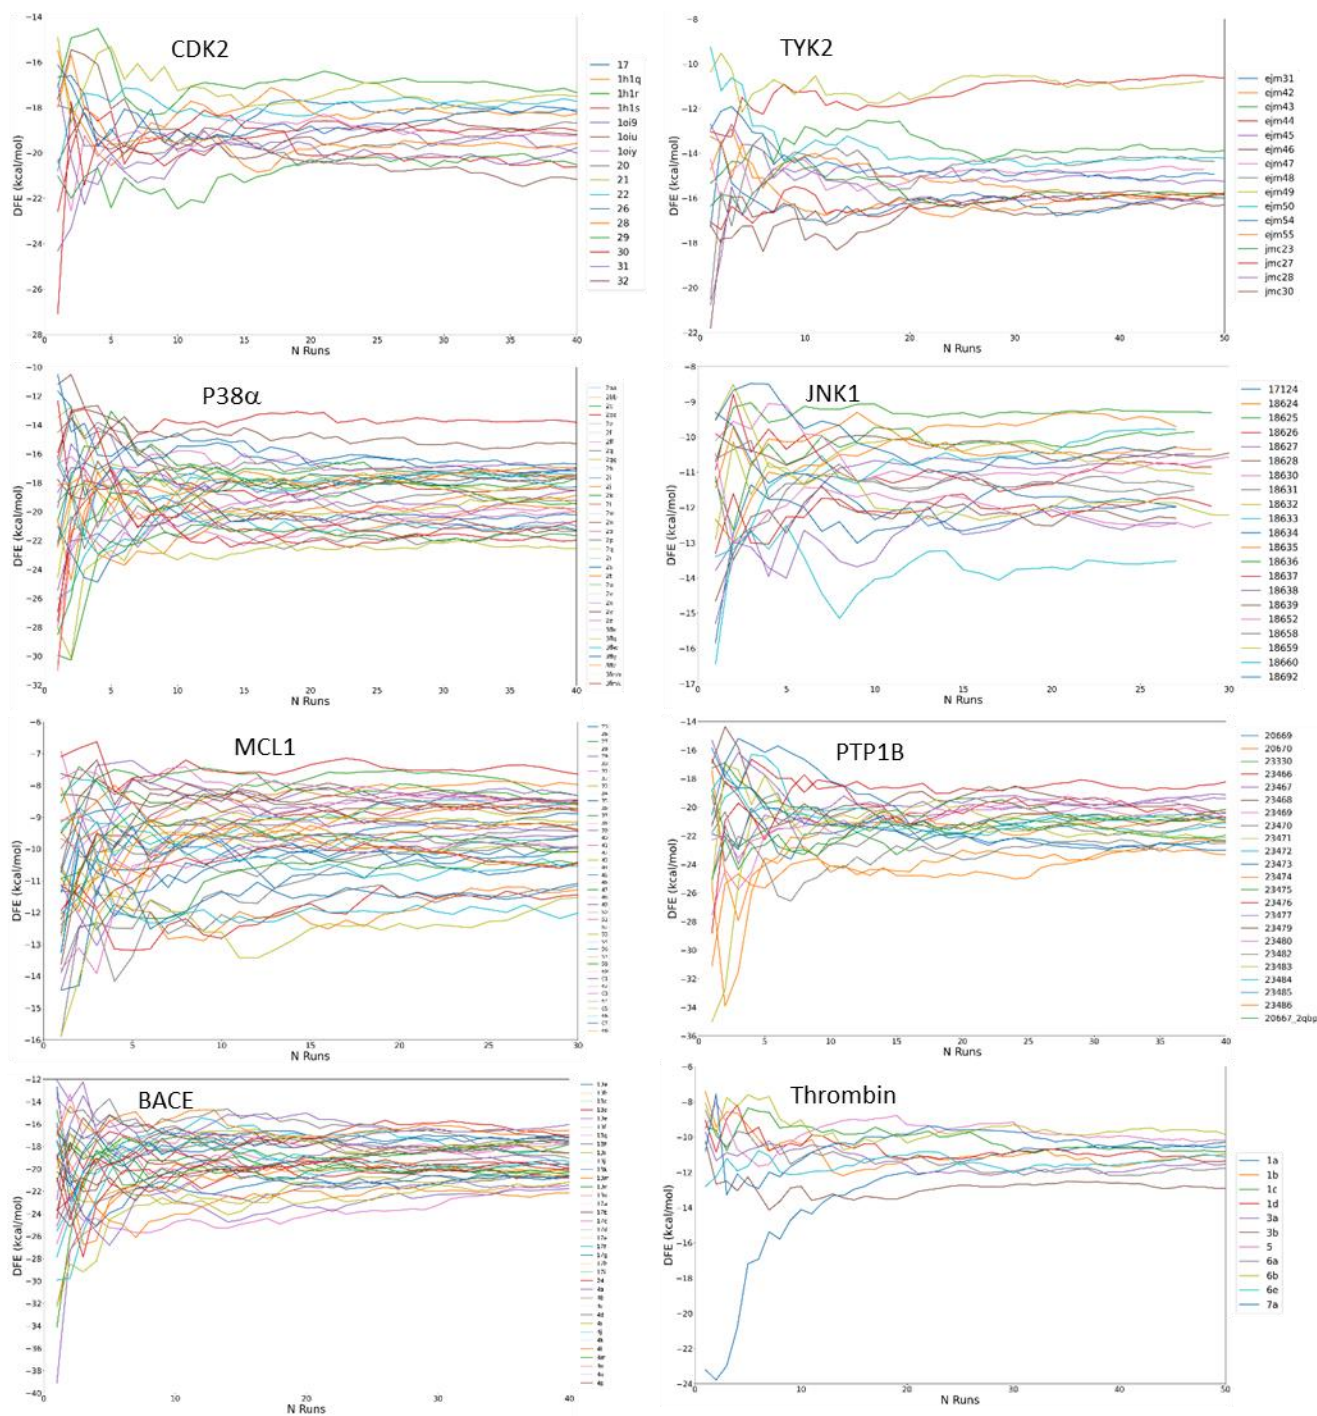

**Supplementary Figure S3. Convergence plots of PLCs for each of the eight targets.** Each curve corresponds to one PLC and the curves of different PLCs of a same target are grouped into one panel.

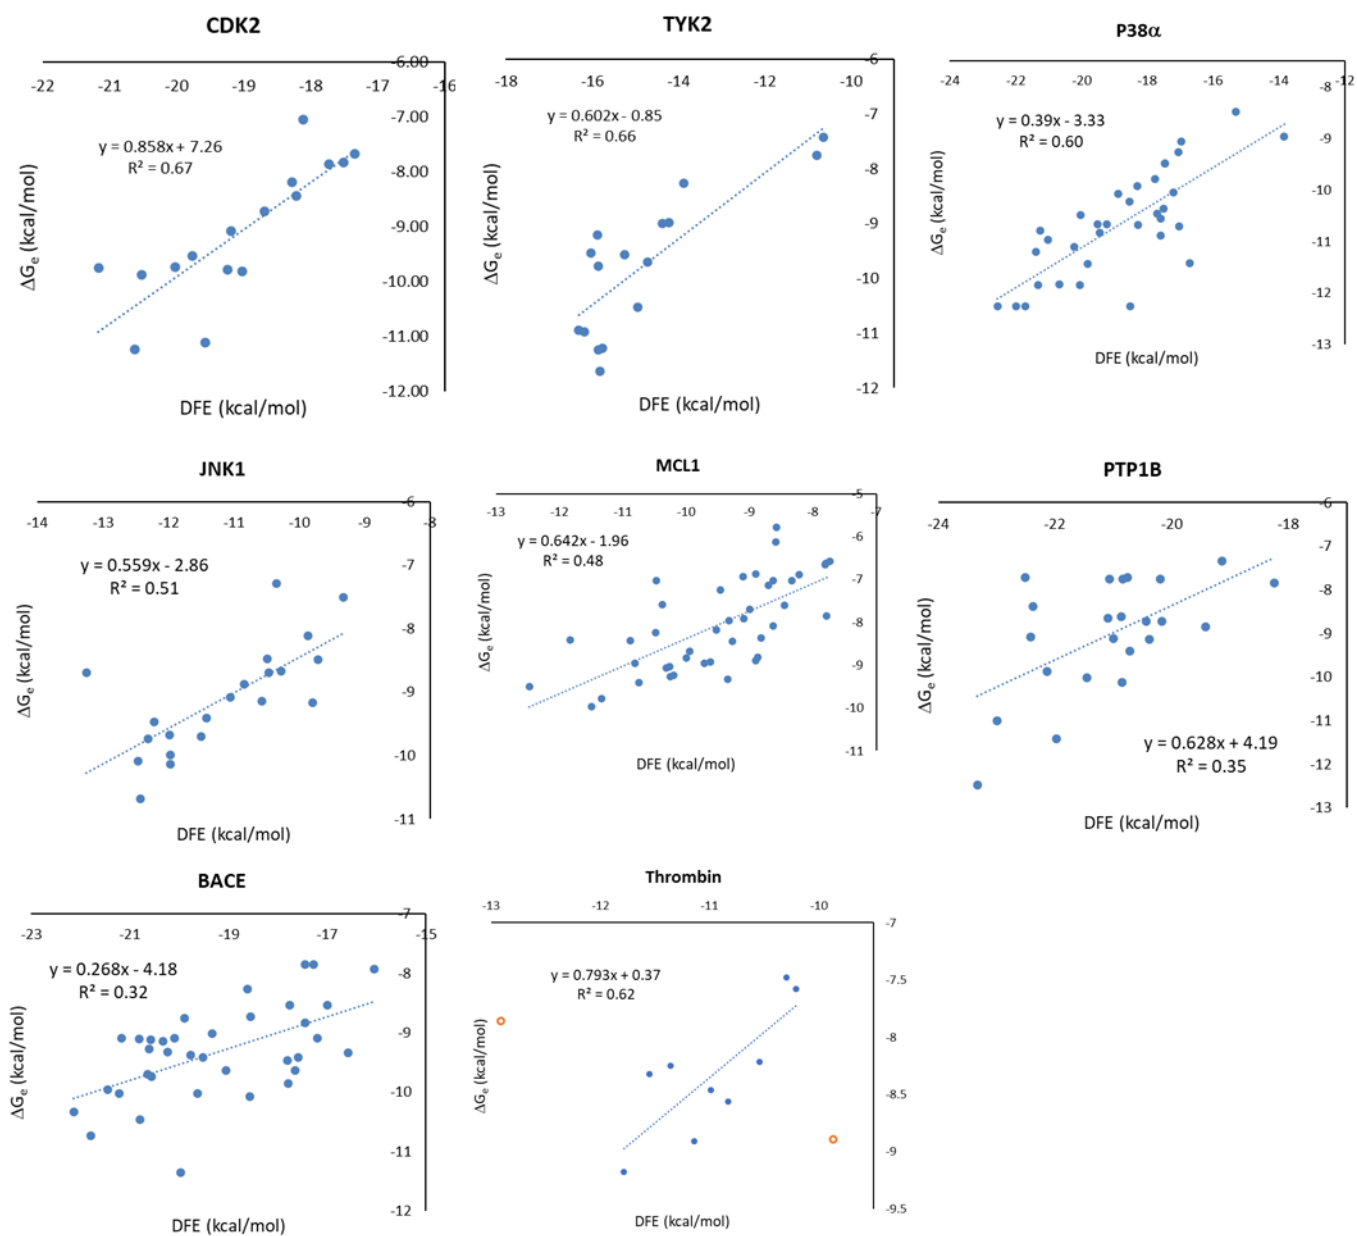

**Supplementary Figure S4. Correlation plots between calculated DFE and experimental binding free energies  $\Delta G_e$ .** Each panel corresponds to a protein target with respect to a set of ligands.

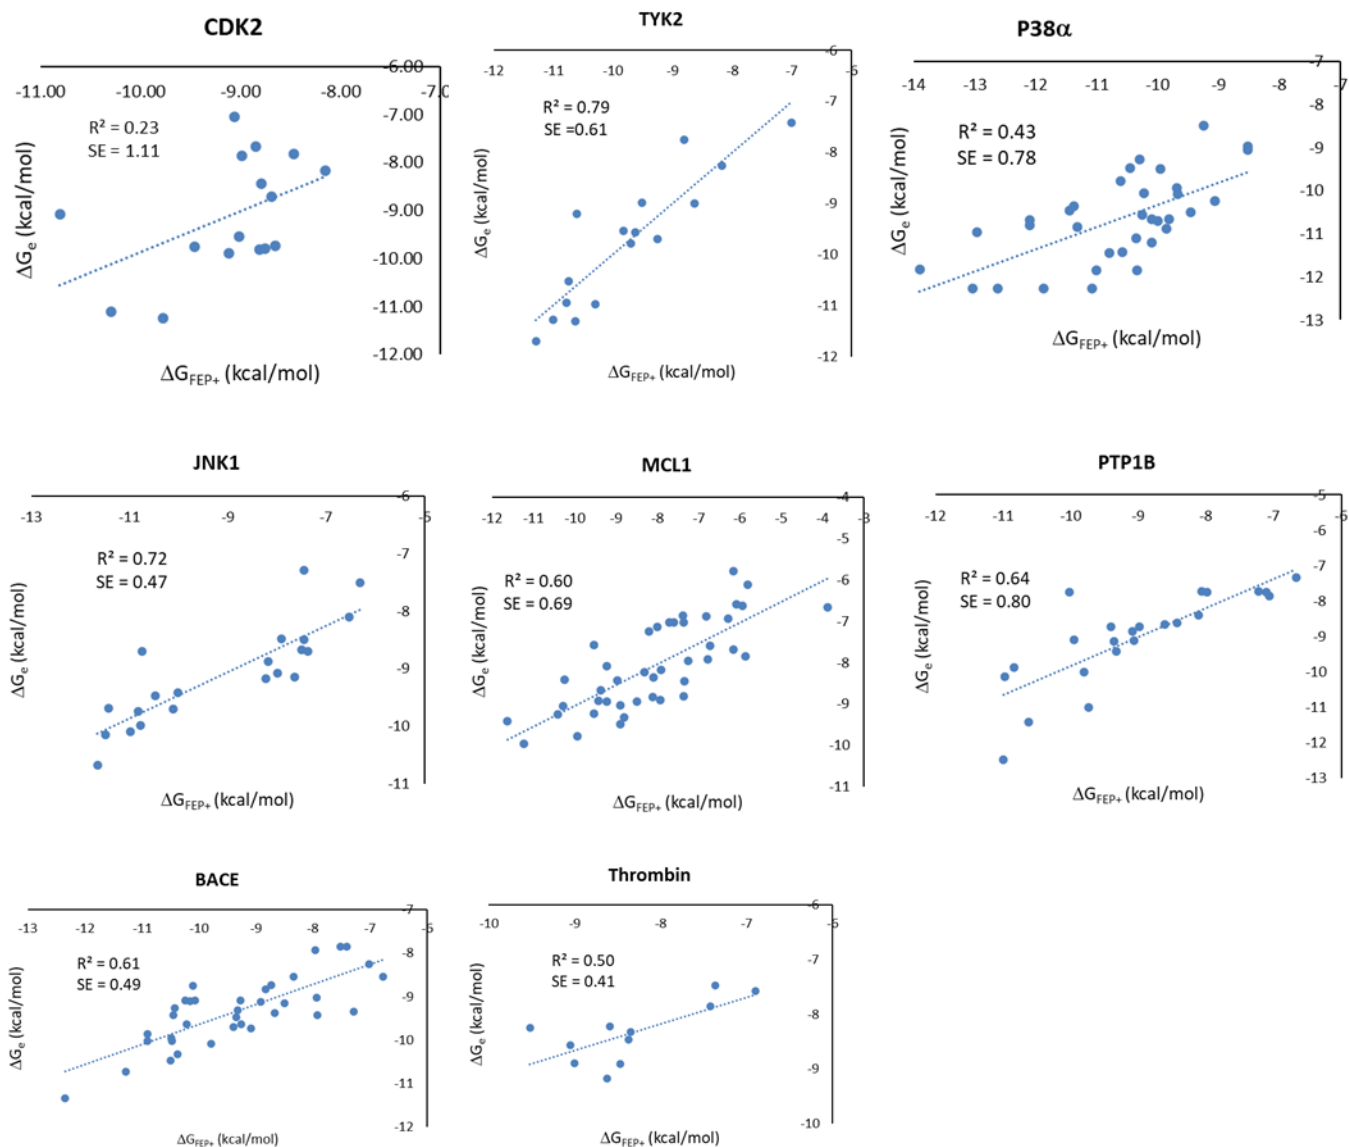

**Supplementary Figure S5. Correlation plots between binding free energies  $\Delta G_{\text{FEP}+}$  calculated using FEP+ program and experimental binding free energies  $\Delta G_e$ .** Each panel corresponds to a protein target with respect to a set of ligands.  $\Delta G_{\text{FEP}+}$  were calculated based on  $\Delta \Delta G_{\text{FEP}+}$ . Both  $\Delta G_{\text{FEP}+}$  and  $\Delta G_e$  were taken from Wang, L. et al. *J. Am. Chem. Soc.* **137**, 2695–2703 (2015).
